# Supplementary material for: Identification of differentially expressed genes and fusion genes associated with malignant progression of spinal cord gliomas by transcriptome analysis
Source: PubMed Central journal article supplement (PMC6753211; doi:10.1038/s41598-019-50072-9), 2019-09-19
Supplement: 41598_2019_50072_MOESM1_ESM.pdf [file 41598_2019_50072_MOESM1_ESM.pdf]

## **Supplementary information**

### **Identification of differently expressed genes, fusion genes and mutated genes associated with the malignant progression of spinal cord gliomas by transcriptome analysis**

Authors:

Dong-kang Liu<sup>1</sup>, Jin Wang<sup>1</sup>, Yi Guo<sup>1</sup>, Zheng-xing Sun<sup>1</sup>, Gui-huai Wang<sup>1,2</sup>

Addresses:

<sup>1</sup>Department of neurosurgery, Beijing Tsinghua Changgung Hospital, 102218, China;

<sup>2</sup>School of Clinical Medicine, Tsinghua University, Beijing, 100084, China.

Corresponding author: Gui-huai Wang

E-mail address: neurospinegh@163.com)

**Supplementary Table S1 Characteristics of libraries mapped to reference gene database**

| <b>Sample ID</b> | <b>Raw reads</b> | <b>Clean reads</b> | <b>Total mapped</b> | <b>Multiple mapped</b> | <b>Uniquely mapped</b> |
|------------------|------------------|--------------------|---------------------|------------------------|------------------------|
| S01 (grade II)   | 26374768         | 18281210           | 16581447 (90.7%)    | 671553 (3.67%)         | 15909894 (87.03%)      |
| S02 (grade II)   | 29287160         | 18308306           | 16430308 (89.74%)   | 627639 (3.43%)         | 15802669 (86.31%)      |
| S03 (grade II)   | 34812436         | 23540518           | 21447731 (91.11%)   | 851822 (3.62%)         | 20595909 (87.49%)      |
| S04 (grade II)   | 26773424         | 14352260           | 12497000 (87.07%)   | 559883 (3.9%)          | 11937117 (83.17%)      |
| S05 (grade IV)   | 33204894         | 18916628           | 16046711 (84.83%)   | 646156 (3.42%)         | 15400555 (81.41%)      |
| S06 (grade IV)   | 31100538         | 20312198           | 18626061 (91.7%)    | 779340 (3.84%)         | 17846721 (87.86%)      |
| S07 (grade IV)   | 26275874         | 14021924           | 11365194 (81.05%)   | 474856 (3.39%)         | 10890338 (77.67%)      |
| S08 (grade IV)   | 32218992         | 20453534           | 18004262 (88.03%)   | 940983 (4.6%)          | 17063279 (83.42%)      |
| S09 (grade IV)   | 24513220         | 14860896           | 12943461 (87.1%)    | 505235 (3.4%)          | 12438226 (83.7%)       |

Note: Sample ID: Sample name;

Raw reads: The number of reads in the raw data;

Clean reads: The number of reads filtered from the raw data;

Total mapped: The number of reads mapped to the genome;

Multiple mapped: Reads number compared to multiple locations of the genome;

Uniquely mapped: Number of reads mapped to a single location of the genome;

**Supplementary Table S2 Sum of differentially expressed genes in IV vs II.**

| <b>Gene</b> | <b>Log<sub>2</sub> FoldChange<br/>IV vs II</b> | <b>P value</b> | <b>FDR-adjusted<br/>P-Value</b> |
|-------------|------------------------------------------------|----------------|---------------------------------|
| DSC3        | -7.644464873                                   | 9.2747E-21     | 2.55E-16                        |
| INSM1       | -4.757408157                                   | 5.60485E-16    | 7.72E-12                        |
| HCG11       | 4.048435957                                    | 2.85798E-15    | 2.62E-11                        |
| COL21A1     | 5.848582591                                    | 2.61561E-14    | 1.80E-10                        |
| ANGPTL1     | -3.396304942                                   | 8.39226E-14    | 4.62E-10                        |
| TTC12       | 3.339669539                                    | 1.55741E-12    | 7.15E-09                        |
| MIR663AHG   | -8.680383152                                   | 2.42055E-12    | 9.44E-09                        |
| TP53TG3D    | -5.185378151                                   | 2.74279E-12    | 9.44E-09                        |
| VPS37B      | 2.81244086                                     | 5.21042E-12    | 1.49E-08                        |
| AC003973.3  | -6.749704046                                   | 5.39692E-12    | 1.49E-08                        |
| PDIA2       | -2.789790546                                   | 6.46502E-12    | 1.62E-08                        |
| TEX14       | -3.49220684                                    | 1.02705E-11    | 2.36E-08                        |
| NTS         | -7.364034876                                   | 5.96609E-11    | 1.26E-07                        |
| LINC01098   | -7.384175145                                   | 7.5591E-11     | 1.48E-07                        |
| PLAG1       | -3.33033095                                    | 8.06609E-11    | 1.48E-07                        |
| AC107952.2  | -3.020672634                                   | 1.42343E-10    | 2.45E-07                        |
| PDLIM4      | 4.04282121                                     | 4.28315E-10    | 6.94E-07                        |
| ZNF560      | -4.6081876                                     | 4.65791E-10    | 7.13E-07                        |
| AL121904.1  | -8.503642103                                   | 2.58352E-09    | 3.74E-06                        |
| MTHFD2      | -2.184382432                                   | 3.13129E-09    | 4.31E-06                        |
| CERS3-AS1   | -7.124660409                                   | 3.92797E-09    | 5.05E-06                        |
| SALL2       | 2.042423998                                    | 4.03736E-09    | 5.05E-06                        |
| NPPA        | -5.117147686                                   | 5.13175E-09    | 6.14E-06                        |
| CD163L1     | -3.916580658                                   | 5.58061E-09    | 6.40E-06                        |
| PAX3        | -3.091501649                                   | 8.24707E-09    | 9.08E-06                        |
| PLEKHG4     | -2.993476157                                   | 8.78503E-09    | 9.31E-06                        |
| ELOVL2      | 2.807287313                                    | 9.6495E-09     | 9.82E-06                        |
| AC012593.1  | 6.116733733                                    | 9.9855E-09     | 9.82E-06                        |
| TCEA3       | 2.50141056                                     | 1.58874E-08    | 1.51E-05                        |
| AC002351.1  | -5.367016888                                   | 1.71192E-08    | 1.57E-05                        |
| AC022893.2  | -4.572351569                                   | 2.69809E-08    | 2.40E-05                        |
| PRAME       | -9.147589372                                   | 2.96841E-08    | 2.55E-05                        |
| HERC2P4     | -4.813024781                                   | 3.50193E-08    | 2.92E-05                        |
| OR5AK4P     | 3.979787313                                    | 3.76244E-08    | 3.05E-05                        |
| TMEM229A    | 3.331206486                                    | 4.89054E-08    | 3.85E-05                        |
| IQGAP2      | -2.867257858                                   | 7.00629E-08    | 5.36E-05                        |
| AL359233.1  | 3.906260429                                    | 8.56009E-08    | 6.37E-05                        |
| ZFHX4       | 4.231190322                                    | 1.10891E-07    | 8.04E-05                        |

|            |              |             |             |
|------------|--------------|-------------|-------------|
| AP002840.2 | 5.046766807  | 1.27343E-07 | 8.99E-05    |
| AC016717.2 | -4.694015645 | 1.60249E-07 | 0.000110327 |
| ZNF208     | -5.133979464 | 1.64882E-07 | 0.000110748 |
| BEAN1      | -2.862682419 | 1.69141E-07 | 0.000110904 |
| CPXM2      | 3.831338999  | 2.32447E-07 | 0.000148869 |
| GPR17      | 5.148566557  | 2.46582E-07 | 0.000154332 |
| CCDC8      | 3.441994921  | 2.67014E-07 | 0.000163407 |
| DMKN       | 4.802693541  | 2.73979E-07 | 0.000164024 |
| PAPPA2     | -3.223563981 | 2.83056E-07 | 0.000164735 |
| MAB21L1    | -3.838732851 | 2.87131E-07 | 0.000164735 |
| AC008556.1 | 2.416191027  | 3.74578E-07 | 0.000210521 |
| PNPLA4     | 2.853256819  | 4.08164E-07 | 0.000224808 |
| NPY5R      | -3.656681678 | 4.31307E-07 | 0.000228688 |
| LINC01993  | -5.14714583  | 4.31817E-07 | 0.000228688 |
| ARAP3      | -2.749019938 | 4.70472E-07 | 0.000244459 |
| ALX3       | -7.154724083 | 5.2235E-07  | 0.000266389 |
| LIMS2      | 4.163685291  | 5.37501E-07 | 0.000267441 |
| ZFHX4-AS1  | 5.083927683  | 5.43835E-07 | 0.000267441 |
| GRM5       | 4.10187018   | 6.13001E-07 | 0.000296166 |
| TKTL1      | -4.500305761 | 6.84177E-07 | 0.000324854 |
| FABP5      | 2.736760314  | 7.02857E-07 | 0.000328068 |
| AL512380.1 | -4.944123346 | 7.15801E-07 | 0.000328541 |
| LINC01436  | -5.053067136 | 7.50135E-07 | 0.000338655 |
| CNN2P8     | 5.322943855  | 8.16575E-07 | 0.000362704 |
| FILIP1L    | -2.352645647 | 9.88889E-07 | 0.000429082 |
| LINC00944  | -6.012477291 | 9.97178E-07 | 0.000429082 |
| AC104041.1 | -6.105182941 | 1.10744E-06 | 0.000468092 |
| TP63       | -4.569705164 | 1.12183E-06 | 0.000468092 |
| MRO        | 2.69626528   | 1.16117E-06 | 0.000477276 |
| FRMD6      | 1.937745695  | 1.26201E-06 | 0.000511096 |
| ANKRD34C   | 5.702175037  | 1.3833E-06  | 0.000552096 |
| CACNB3     | -2.450926087 | 1.45727E-06 | 0.000573311 |
| SPX        | 3.766180047  | 1.61298E-06 | 0.000625632 |
| CNMD       | 3.730431934  | 1.64038E-06 | 0.000627424 |
| AL355974.3 | -3.751578875 | 1.75819E-06 | 0.000663271 |
| RAB34      | 2.785875496  | 1.87693E-06 | 0.000698497 |
| GLIS1      | -2.647677692 | 1.95661E-06 | 0.00071844  |
| WSCD2      | 3.721535607  | 1.99745E-06 | 0.000723785 |
| FAM162B    | -2.636745292 | 2.35023E-06 | 0.00084056  |
| OSR1       | -4.768696952 | 2.44743E-06 | 0.000857315 |
| ACSM4      | -4.735939035 | 2.45934E-06 | 0.000857315 |
| NPY2R      | -6.927528924 | 2.50691E-06 | 0.000862973 |
| HSPA2      | 3.115854541  | 2.57299E-06 | 0.000869136 |
| MUC12      | -3.775541276 | 2.59765E-06 | 0.000869136 |

|              |              |             |             |
|--------------|--------------|-------------|-------------|
| LIF          | -3.056087175 | 2.6195E-06  | 0.000869136 |
| AC109466.1   | -6.734968879 | 2.90094E-06 | 0.000951059 |
| NMU          | -4.878662637 | 3.05069E-06 | 0.000987559 |
| PCDHGA9      | 4.072507508  | 3.08399E-06 | 0.000987559 |
| TBX5         | 5.891410841  | 3.12977E-06 | 0.000990697 |
| GPD1         | 2.749639667  | 3.33804E-06 | 0.001044618 |
| MGAT5B       | -1.98115571  | 3.47755E-06 | 0.001076048 |
| AC138761.4   | -7.145596302 | 3.73913E-06 | 0.001144132 |
| A2MP1        | 1.493783104  | 4.31055E-06 | 0.001304487 |
| AC100863.1   | -5.630074048 | 4.409E-06   | 0.001319777 |
| CCT7P2       | 3.622224281  | 4.58626E-06 | 0.001341594 |
| RP11-435B5.5 | -4.731831825 | 4.62139E-06 | 0.001341594 |
| GALR1        | -2.986850688 | 4.62803E-06 | 0.001341594 |
| COL5A1       | -3.236190007 | 4.88889E-06 | 0.001402449 |
| COPZ2        | 2.45764328   | 4.95963E-06 | 0.001408075 |
| PRICKLE3     | 2.281443846  | 5.08847E-06 | 0.001429912 |
| MFAP2        | -3.081022594 | 5.40668E-06 | 0.001503987 |
| RPS28P7      | -2.377599865 | 5.49237E-06 | 0.001512545 |
| APC          | 1.286704968  | 5.61789E-06 | 0.001531794 |
| CHSY1        | -1.543770817 | 6.14144E-06 | 0.001658129 |
| AC010636.1   | -6.53741555  | 6.29978E-06 | 0.001669941 |
| LINC00870    | 4.640031031  | 6.30647E-06 | 0.001669941 |
| AL845331.1   | 4.645493422  | 6.45725E-06 | 0.001693583 |
| AC021218.1   | -5.402962907 | 6.54571E-06 | 0.001700588 |
| AC073365.1   | -9.088799312 | 6.75998E-06 | 0.001739842 |
| CHDH         | 1.477829771  | 7.0082E-06  | 0.001787026 |
| BSPRY        | 3.314865659  | 7.29544E-06 | 0.001829074 |
| DLG5-AS1     | -1.919400462 | 7.33662E-06 | 0.001829074 |
| HPSE2        | 4.969459944  | 7.37235E-06 | 0.001829074 |
| CLEC2B       | -2.176180598 | 7.7678E-06  | 0.001909978 |
| RHOD         | 3.211622741  | 8.0926E-06  | 0.001972232 |
| NRN1         | 3.622332004  | 8.8322E-06  | 0.002133596 |
| FABP5P7      | 2.77419541   | 8.94595E-06 | 0.002142282 |
| SLC39A12     | 3.351338244  | 9.06446E-06 | 0.00215195  |
| NPAS1        | 4.122628687  | 9.20431E-06 | 0.002166474 |
| SPOCD1       | -3.956560042 | 9.82323E-06 | 0.00229256  |
| NPY1R        | -2.117313312 | 1.00139E-05 | 0.002317425 |
| SLC43A2      | 1.814651239  | 1.04447E-05 | 0.00239697  |
| DNAJC15      | 1.269704813  | 1.12576E-05 | 0.002562168 |
| AGTR1        | -5.170728093 | 1.18406E-05 | 0.00267278  |
| SPTSSB       | -3.195173809 | 1.23227E-05 | 0.002758979 |
| FKBP5        | -3.909012656 | 1.25845E-05 | 0.002794867 |
| SIGLEC1      | -2.882725491 | 1.28938E-05 | 0.002825899 |
| ACOT1        | 2.431159478  | 1.29294E-05 | 0.002825899 |

|            |              |             |             |
|------------|--------------|-------------|-------------|
| AC073578.2 | -4.879862715 | 1.34528E-05 | 0.00291713  |
| MTND1P23   | -6.437867426 | 1.41355E-05 | 0.003041232 |
| LINC02094  | -3.408775539 | 1.57807E-05 | 0.003345308 |
| LINC01257  | -5.33304191  | 1.58814E-05 | 0.003345308 |
| CBX2       | -2.68419043  | 1.59133E-05 | 0.003345308 |
| CXCL10     | -3.387200186 | 1.65208E-05 | 0.003446718 |
| BEX2       | 1.801355602  | 1.67899E-05 | 0.00347652  |
| BCL11A     | -3.294846315 | 1.70709E-05 | 0.003508334 |
| LINC00900  | 1.966832175  | 1.73059E-05 | 0.003530283 |
| HSF4       | -2.158418587 | 1.76127E-05 | 0.003566445 |
| SAMD14     | -1.64610371  | 1.79426E-05 | 0.003606729 |
| STXBP6     | 1.879392512  | 1.82002E-05 | 0.003622027 |
| LGSN       | -4.513488141 | 1.82818E-05 | 0.003622027 |
| SERPINE1   | -2.844319491 | 1.96211E-05 | 0.003859601 |
| GSX1       | -3.653817453 | 2.02564E-05 | 0.00395632  |
| AC108156.1 | 5.650797199  | 2.24583E-05 | 0.004331141 |
| OCIAD2     | -2.464085196 | 2.26165E-05 | 0.004331141 |
| SVEP1      | -3.235852787 | 2.27874E-05 | 0.004331141 |
| MUM1L1     | -2.241059001 | 2.28046E-05 | 0.004331141 |
| TMEM184A   | -4.493275624 | 2.45048E-05 | 0.004622177 |
| TMSB10     | -1.433457103 | 2.54658E-05 | 0.004770774 |
| DNM1       | -1.557955363 | 2.58555E-05 | 0.00481104  |
| AC112255.1 | -6.432565448 | 2.67073E-05 | 0.004919971 |
| AC027290.2 | 2.36600108   | 2.69298E-05 | 0.004919971 |
| LINC02388  | -5.556839856 | 2.69769E-05 | 0.004919971 |
| DRAXIN     | -2.938571849 | 2.74469E-05 | 0.004972762 |
| C6orf141   | -4.477223764 | 2.80134E-05 | 0.005022783 |
| AF279873.3 | -4.658063865 | 2.80878E-05 | 0.005022783 |
| MROH3P     | 3.256099892  | 3.05796E-05 | 0.00543311  |
| FABP6      | -3.68180446  | 3.08902E-05 | 0.005453114 |
| PDLIM1     | -2.945507139 | 3.17195E-05 | 0.005504303 |
| BMP7       | 1.906375184  | 3.17755E-05 | 0.005504303 |
| GYPE       | -2.34190573  | 3.17798E-05 | 0.005504303 |
| LINC00639  | 2.395847562  | 3.28555E-05 | 0.005655056 |
| C2CD4C     | -2.383600399 | 3.30988E-05 | 0.005661536 |
| CLVS2      | 4.118044393  | 3.48813E-05 | 0.0059296   |
| MMP23B     | -3.695747026 | 3.54976E-05 | 0.005997354 |
| ERVW-1     | 1.731842783  | 3.6021E-05  | 0.006037212 |
| HOXB5      | 1.878242281  | 3.6172E-05  | 0.006037212 |
| EMX2OS     | 2.98752369   | 3.69428E-05 | 0.006128722 |
| EMX2       | 3.146923035  | 3.74421E-05 | 0.006173335 |
| DLK1       | -7.924022069 | 3.76601E-05 | 0.006173335 |
| B4GALNT1   | -2.30361355  | 4.38385E-05 | 0.007143594 |
| GPD1L      | 2.450590631  | 4.47442E-05 | 0.00721667  |

|             |              |             |             |
|-------------|--------------|-------------|-------------|
| DNAH3       | -3.665192461 | 4.48163E-05 | 0.00721667  |
| NR3C2       | 2.595548419  | 4.50731E-05 | 0.00721667  |
| AP000525.10 | -3.412986557 | 4.68682E-05 | 0.00746071  |
| GPR37L1     | 2.868855656  | 4.73541E-05 | 0.007494734 |
| AC022215.1  | -3.042312805 | 4.77844E-05 | 0.007519628 |
| RASD1       | -3.351039617 | 4.90338E-05 | 0.007672398 |
| AC006946.3  | -2.732593984 | 5.14534E-05 | 0.008005504 |
| CRYGD       | -3.756098054 | 5.47911E-05 | 0.008440118 |
| SYT7        | -2.735527023 | 5.48597E-05 | 0.008440118 |
| WNT6        | -4.2294029   | 5.57359E-05 | 0.008527289 |
| AC006548.3  | -3.444037561 | 5.61748E-05 | 0.008546943 |
| AC099654.7  | -5.942090208 | 5.8194E-05  | 0.00880552  |
| KCNS1       | 3.539331534  | 5.92269E-05 | 0.00891284  |
| LINC00346   | -2.865412172 | 6.05361E-05 | 0.009060339 |
| SCN5A       | -3.389938577 | 6.33631E-05 | 0.009432203 |
| TNFRSF12A   | -1.816032417 | 6.40089E-05 | 0.009435857 |
| PCDHGC4     | 4.081426323  | 6.44991E-05 | 0.009435857 |
| NPSR1-AS1   | -5.347191345 | 6.47053E-05 | 0.009435857 |
| SLC6A15     | -3.634437722 | 6.47971E-05 | 0.009435857 |
| GSX2        | -3.57899244  | 6.51009E-05 | 0.009435857 |
| KHDRBS2     | -3.552391119 | 6.71771E-05 | 0.009685815 |
| PCDHGC3     | 3.450061259  | 6.95072E-05 | 0.009947335 |
| TLR10       | 2.740048268  | 6.97133E-05 | 0.009947335 |
| ACOT2       | 1.348741288  | 7.09435E-05 | 0.010057304 |
| AC005220.1  | 4.08690331   | 7.12144E-05 | 0.010057304 |
| SLITRK5     | 1.326492477  | 7.22384E-05 | 0.010149861 |
| HOXB7       | 1.983641441  | 7.45504E-05 | 0.010421535 |
| TNFRSF18    | -2.486586367 | 7.60124E-05 | 0.010572251 |
| STK26       | -2.368553784 | 7.87033E-05 | 0.010845459 |
| JADE1       | -1.334598177 | 7.87644E-05 | 0.010845459 |
| PCA3        | -2.983461013 | 7.97887E-05 | 0.010931844 |
| MYO7A       | -2.312450221 | 8.28123E-05 | 0.011289936 |
| LINC01170   | 3.447144926  | 8.39522E-05 | 0.011388958 |
| AC022905.1  | -4.795460462 | 8.50185E-05 | 0.011477075 |
| HLA-F       | -4.880337682 | 8.68899E-05 | 0.011639023 |
| BCAS1       | 3.113002467  | 8.75285E-05 | 0.011639023 |
| HOXB-AS2    | 2.967564223  | 8.75816E-05 | 0.011639023 |
| MOV10L1     | 2.136691132  | 8.79355E-05 | 0.011639023 |
| AC040160.1  | -2.269562401 | 8.83313E-05 | 0.011639023 |
| AP001372.1  | -2.858658204 | 9.12E-05    | 0.011959799 |
| KRT18P14    | -3.160451216 | 9.16663E-05 | 0.011963968 |
| SNORD3B-2   | -3.74735665  | 9.90954E-05 | 0.012872588 |
| KCNB2       | -4.785326382 | 9.98768E-05 | 0.012913179 |
| RNU2-57P    | -6.045551001 | 0.000102031 | 0.013130109 |

|                  |              |             |             |
|------------------|--------------|-------------|-------------|
| AL139393.2       | -2.737111897 | 0.000104213 | 0.013243384 |
| SOWAHA           | 2.399463172  | 0.000104258 | 0.013243384 |
| PSMC1P7          | -4.742793634 | 0.000104354 | 0.013243384 |
| GADD45A          | -2.377299928 | 0.000105753 | 0.013359327 |
| ITPR2            | 1.57304713   | 0.000107934 | 0.013552805 |
| ACBD7            | 2.99762363   | 0.00010853  | 0.013552805 |
| AL109924.4       | -4.473908192 | 0.000108761 | 0.013552805 |
| MGAM             | -2.328648574 | 0.00011112  | 0.013784375 |
| HSD17B6          | 2.730204159  | 0.000112973 | 0.013951423 |
| GAP43            | -2.26486927  | 0.000115538 | 0.014204439 |
| HS3ST3A1         | -4.460078887 | 0.000116277 | 0.014231768 |
| AC007681.1       | -1.997136562 | 0.000118242 | 0.014368883 |
| AL109924.2       | -4.47356612  | 0.000118539 | 0.014368883 |
| PRODH            | 2.168578578  | 0.000118962 | 0.014368883 |
| RGS20            | 2.745971632  | 0.000119506 | 0.014371495 |
| UBL4B            | -5.010769611 | 0.000120379 | 0.014413532 |
| XK               | 1.54164891   | 0.000123675 | 0.014744059 |
| IL36G            | -5.172160671 | 0.00012622  | 0.014982664 |
| NOS2             | -1.663714216 | 0.000130438 | 0.01536706  |
| AQP7P2           | -4.359000364 | 0.000130724 | 0.01536706  |
| AP003900.1       | -9.724557949 | 0.000131133 | 0.01536706  |
| FZD10-AS1        | -2.825637462 | 0.000135628 | 0.015758105 |
| EBF1             | -2.267007974 | 0.000135914 | 0.015758105 |
| ENTPD2           | 3.515811129  | 0.000136186 | 0.015758105 |
| GNRH1            | -1.887017916 | 0.000138916 | 0.016006712 |
| Z73979.1         | -3.042659485 | 0.000141743 | 0.016264452 |
| ATP2B3           | 3.412077788  | 0.000142409 | 0.016273075 |
| EXTL1            | 1.929599317  | 0.000146868 | 0.016713257 |
| TENM2            | -2.934680186 | 0.000148112 | 0.016713661 |
| CIPC             | 1.512977644  | 0.000148452 | 0.016713661 |
| PGR              | 2.745098119  | 0.000148693 | 0.016713661 |
| AC015712.6       | -2.30657579  | 0.000153082 | 0.017137133 |
| LL22NC03-N64E9.1 | -4.332723457 | 0.000156145 | 0.017409214 |
| AC092652.1       | 5.729327765  | 0.000157139 | 0.017449435 |
| PCDHGC5          | 2.496088166  | 0.000158609 | 0.017500532 |
| ERI2             | 1.176714944  | 0.00015887  | 0.017500532 |
| FAM160A1         | -5.136766007 | 0.000160546 | 0.017614682 |
| FREM3            | -3.65706256  | 0.000166361 | 0.018180251 |
| BIRC7            | -2.867909262 | 0.000167728 | 0.018257109 |
| CNGB1            | -6.149890342 | 0.000169499 | 0.01837725  |
| TSPAN2           | -2.752825626 | 0.000175839 | 0.018982422 |
| AL031728.1       | -2.433397618 | 0.000176459 | 0.018982422 |
| BANCR            | -4.094502173 | 0.000179876 | 0.019274743 |
| AC107375.1       | -1.197009306 | 0.000181675 | 0.019392006 |



|                   |              |             |             |
|-------------------|--------------|-------------|-------------|
| PCDHA11           | 2.848181708  | 0.000183629 | 0.019524975 |
| MAGEC2            | -7.968210488 | 0.000186563 | 0.019760557 |
| AC145098.2        | -2.208041003 | 0.000187298 | 0.019762484 |
| NYAP2             | -4.082996618 | 0.000192352 | 0.020218259 |
| GABRE             | -2.487780459 | 0.000194767 | 0.020394237 |
| CLIC5             | 1.995243061  | 0.000198968 | 0.020755187 |
| CASZ1             | -2.441336768 | 0.000204451 | 0.021246701 |
| NPC1L1            | -2.961674862 | 0.000206315 | 0.021359849 |
| AC008554.1        | -3.983514984 | 0.000208035 | 0.021457215 |
| LINC00871         | -5.358204506 | 0.000209965 | 0.021575503 |
| BEAN1-AS1         | -3.228103654 | 0.000214311 | 0.021896648 |
| HIRAP1            | -3.605382397 | 0.000214681 | 0.021896648 |
| MEGF10            | 2.151133403  | 0.000217707 | 0.022123383 |
| AC008708.1        | -5.453672264 | 0.000223953 | 0.02267441  |
| LDHB              | 1.527915183  | 0.000234176 | 0.023548782 |
| CAB39L            | 1.55738958   | 0.000234588 | 0.023548782 |
| FGF13             | -1.594590977 | 0.00023576  | 0.023548782 |
| PIN4P1            | -2.886581191 | 0.000236009 | 0.023548782 |
| EPOR              | 1.359105489  | 0.000239111 | 0.023772106 |
| BX255923.3        | -3.463643935 | 0.000245417 | 0.024276411 |
| AC060766.1        | 2.806481709  | 0.000245946 | 0.024276411 |
| AC004877.1        | 2.92905524   | 0.000247951 | 0.024386874 |
| PPP1R16B          | 2.428561335  | 0.000251281 | 0.024531604 |
| STX8P1            | -2.500614108 | 0.000251516 | 0.024531604 |
| RINL              | 1.865257067  | 0.00025215  | 0.024531604 |
| ATP1A2            | 2.589111897  | 0.000252986 | 0.024531604 |
| RDH10             | -1.53154111  | 0.000257265 | 0.024772075 |
| OR7E115P          | 5.201241917  | 0.000258952 | 0.024822834 |
| AC017006.2        | -3.085818938 | 0.000260349 | 0.024822834 |
| LINC01060         | -5.764420013 | 0.000260496 | 0.024822834 |
| AC136424.2        | -3.380664538 | 0.000267817 | 0.025345406 |
| GAL               | -4.192149813 | 0.000268375 | 0.025345406 |
| FOXF2             | 1.794376037  | 0.000268741 | 0.025345406 |
| AC011195.2        | -5.059456383 | 0.000270307 | 0.025406088 |
| LL22NC03-N14H11.1 | -3.454807382 | 0.000277948 | 0.026035365 |
| HAGLROS           | 2.748682983  | 0.000278932 | 0.02603902  |
| AP003119.3        | -2.269643835 | 0.00028193  | 0.026201945 |
| IGHV3-9           | 6.237014823  | 0.000283135 | 0.026201945 |
| FGF13-AS1         | -2.67206446  | 0.000284347 | 0.026201945 |
| TDRD9             | 3.298061077  | 0.000285267 | 0.026201945 |
| DUSP5P1           | -3.065241725 | 0.000285656 | 0.026201945 |
| CITED1            | -3.014429331 | 0.000286386 | 0.026201945 |
| ERMP1             | 1.278817831  | 0.000289406 | 0.026390593 |
| MICA              | 2.682244157  | 0.00029153  | 0.026496495 |

|            |              |             |             |
|------------|--------------|-------------|-------------|
| AC092112.1 | -3.142721798 | 0.000292814 | 0.026525629 |
| MT1G       | 3.665337323  | 0.000294722 | 0.026610998 |
| GJB6       | 6.194612287  | 0.000297907 | 0.026810665 |
| C17orf67   | -1.713445595 | 0.000320513 | 0.028751184 |
| MTSS1L     | 1.625864702  | 0.000321753 | 0.028768714 |
| LIN7A      | -1.622614285 | 0.000326415 | 0.029091113 |
| EFNA5      | -3.747240945 | 0.000333239 | 0.029603462 |
| PWRN1      | -3.463571147 | 0.00033572  | 0.029643301 |
| AC022113.1 | -2.151622225 | 0.000336035 | 0.029643301 |
| CHCHD2P11  | -4.446998958 | 0.00033753  | 0.029643301 |
| GLT1D1     | -1.824932363 | 0.000337993 | 0.029643301 |
| DSG2       | -3.386520571 | 0.000342497 | 0.029942938 |
| AC016044.1 | 5.988822729  | 0.000343856 | 0.029966637 |
| PNCK       | 2.182920915  | 0.000345293 | 0.029996885 |
| AC068987.3 | -3.750669577 | 0.000347105 | 0.030059501 |
| CCNYL2     | -3.066793003 | 0.000350915 | 0.030248219 |
| AC018695.7 | 4.848871869  | 0.000351481 | 0.030248219 |
| HMGA1P7    | 6.242618376  | 0.000354118 | 0.030380277 |
| LINC01405  | -3.925305003 | 0.000356004 | 0.030447154 |
| SCARF2     | -1.661394647 | 0.000359741 | 0.030671548 |
| ELAVL4     | -2.325372411 | 0.000367775 | 0.031259716 |
| AC093642.2 | 2.923813657  | 0.000388673 | 0.032934319 |
| KRT16P2    | -7.571760694 | 0.000390064 | 0.03295084  |
| RSPO3      | -3.597557925 | 0.000392118 | 0.033023011 |
| SNORD124   | -5.084888543 | 0.000400462 | 0.033538941 |
| LINC02058  | 3.452324622  | 0.000401699 | 0.033538941 |
| AC078917.1 | -5.115471492 | 0.000402616 | 0.033538941 |
| GPR161     | -1.090718872 | 0.000403587 | 0.033538941 |
| LINC02100  | -2.667363744 | 0.000404333 | 0.033538941 |
| ACAA2      | 1.298204011  | 0.000411733 | 0.034050199 |
| ANKRD28    | 1.156119363  | 0.000422876 | 0.034867047 |
| CCNA1      | -3.058787455 | 0.000425885 | 0.035010305 |
| FOXQ1      | 2.327984883  | 0.000427774 | 0.035041206 |
| ALDH6A1    | 1.464744058  | 0.000428806 | 0.035041206 |
| COL24A1    | -3.338398779 | 0.000431795 | 0.035171743 |
| AC093895.1 | -4.176665931 | 0.000432958 | 0.035171743 |
| UPK3A      | 3.028871934  | 0.000436218 | 0.035309435 |
| AACSP1     | -4.471332115 | 0.000437677 | 0.035309435 |
| IGFBP3     | -3.155122921 | 0.000438499 | 0.035309435 |
| SEPT7P3    | 2.902712767  | 0.000440168 | 0.03534048  |
| NNMT       | -3.561347309 | 0.000443672 | 0.035401024 |
| CHADL      | 2.167714384  | 0.000444408 | 0.035401024 |
| KLF6       | -1.094197598 | 0.000444778 | 0.035401024 |
| PCDHA4     | 3.134398727  | 0.000448959 | 0.035630808 |

|              |              |             |             |
|--------------|--------------|-------------|-------------|
| PLPP4        | 1.163189491  | 0.000451911 | 0.035706526 |
| IGF2BP2-AS1  | -2.403379259 | 0.000452507 | 0.035706526 |
| FBN2         | -2.517646438 | 0.000459283 | 0.036137735 |
| PDE10A       | -2.043510665 | 0.000471367 | 0.036877771 |
| FAM84B       | -1.39580359  | 0.000473434 | 0.036934554 |
| AC080100.1   | 1.49847605   | 0.000475087 | 0.036958799 |
| LINC01829    | -4.651596088 | 0.000482068 | 0.037396291 |
| FBXL22       | 1.534961982  | 0.000490516 | 0.037944702 |
| MIR5690      | -4.792159491 | 0.000493016 | 0.038031305 |
| LINC01140    | 2.530813954  | 0.000500009 | 0.038462999 |
| HHIP-AS1     | -1.729221196 | 0.000515983 | 0.039581205 |
| GJB2         | 3.026247291  | 0.000521139 | 0.039831892 |
| TEX22        | 1.620395508  | 0.00052268  | 0.039831892 |
| LINC01561    | 1.387266819  | 0.00052426  | 0.039831892 |
| IP6K3        | -2.741733677 | 0.000525036 | 0.039831892 |
| EDARADD      | -2.571972833 | 0.000526853 | 0.039859918 |
| AP001521.1   | 4.933134532  | 0.000538828 | 0.040654197 |
| HLA-A        | -5.581744431 | 0.000541247 | 0.040725151 |
| CEL          | -1.790452862 | 0.000549527 | 0.041235471 |
| ISYNA1       | -1.237400937 | 0.000555983 | 0.041520946 |
| C8orf4       | -2.303681602 | 0.000556347 | 0.041520946 |
| RNF141       | 1.074970691  | 0.000558294 | 0.041553704 |
| AC024451.4   | -2.050352898 | 0.000564002 | 0.041816883 |
| SLC47A1P1    | -5.025964089 | 0.000565908 | 0.041816883 |
| FGR          | -1.448398265 | 0.000566386 | 0.041816883 |
| PAH          | 2.778270873  | 0.000575488 | 0.042341617 |
| LINC01679    | -3.686348503 | 0.000576568 | 0.042341617 |
| HIST1H2BH    | -2.609847102 | 0.000584614 | 0.0427867   |
| FAM50B       | 2.327432222  | 0.000586965 | 0.0427867   |
| SORCS2       | 1.74592075   | 0.00058729  | 0.0427867   |
| LINC01535    | 1.33461199   | 0.000597126 | 0.043388513 |
| SLC25A5      | 1.517676479  | 0.000604647 | 0.043819385 |
| FGF5         | -4.734752983 | 0.000607309 | 0.043830486 |
| AC004448.4   | -2.138803399 | 0.000608119 | 0.043830486 |
| METTL24      | 3.260404154  | 0.000609575 | 0.043830486 |
| HOXB6        | 2.811615802  | 0.000616736 | 0.044158994 |
| HACD3        | 1.476853425  | 0.00061735  | 0.044158994 |
| AC104461.1   | 3.309378208  | 0.000627284 | 0.044753305 |
| GPRC5A       | -3.415520467 | 0.000633136 | 0.044962436 |
| RP11-782C8.2 | -3.337924452 | 0.000633481 | 0.044962436 |
| CDH18        | -2.305964548 | 0.000643266 | 0.045539587 |
| LINC01750    | -2.107347203 | 0.000651334 | 0.045992559 |
| AL162731.1   | -4.376203643 | 0.000654183 | 0.04607554  |
| MDGA2        | 1.806972757  | 0.000657477 | 0.046114886 |

|            |              |             |             |
|------------|--------------|-------------|-------------|
| ALX1       | -7.801851928 | 0.00065809  | 0.046114886 |
| AC090692.1 | -2.48181863  | 0.00065982  | 0.046118772 |
| FCRLA      | 3.240039808  | 0.000663481 | 0.046257226 |
| SGCD       | 1.502176983  | 0.000674355 | 0.046820027 |
| AC007240.1 | -3.50070573  | 0.000674954 | 0.046820027 |
| AL354919.2 | -5.278010553 | 0.000677284 | 0.046863645 |
| CDK18      | 2.646107571  | 0.000686913 | 0.047410777 |
| AC118942.1 | -5.485185233 | 0.000695344 | 0.047872706 |
| ASIC2      | 2.703498696  | 0.000704608 | 0.048271825 |
| AC021683.3 | -3.714653592 | 0.000704647 | 0.048271825 |
| AC023794.3 | 2.442013728  | 0.000706434 | 0.04827417  |
| AC006058.4 | 3.0081952    | 0.000711838 | 0.048523067 |
| RPS3AP14   | -2.65973728  | 0.000716734 | 0.048533634 |
| AL160286.2 | -3.179367667 | 0.000719349 | 0.048533634 |
| AC009902.2 | 3.366317782  | 0.000720448 | 0.048533634 |
| GPR135     | 1.152219671  | 0.000720805 | 0.048533634 |
| APOL4      | -2.23186537  | 0.000728605 | 0.048939173 |
| AC020913.3 | -2.354072807 | 0.000736052 | 0.049319041 |
| TYRP1      | -4.042966946 | 0.0007395   | 0.049377417 |
| AC068491.4 | -2.718734003 | 0.000742103 | 0.049377417 |
| NAPEPLD    | 1.410854247  | 0.000743852 | 0.049377417 |
| FA2H       | 3.018440872  | 0.000746911 | 0.049377417 |
| KY         | 2.096585794  | 0.000747149 | 0.049377417 |
| CADPS      | -1.680534177 | 0.000747681 | 0.049377417 |
| SEC11C     | 1.471961517  | 0.00075615  | 0.049762054 |
| PITX1      | -6.557106128 | 0.000757119 | 0.049762054 |

Note:

Log<sub>2</sub> FoldChange (IV vs II): The multiple value of difference between two samples or comparison combinations, expressed as log<sub>2</sub> (group1/group2), calculated according to the difference analysis software

*P* value: *P* value of significance test

FDR-adjusted *P*-Value: *P* value of multiple hypothesis test correction

Supplementary Table S3 Pathway analysis of differentially expressed genes in IV vs II.

| Pathway ID | Description                                     | <i>P</i> value  | FDR-adjusted <i>P</i> -Value | Gene ID                                                        | Count |
|------------|-------------------------------------------------|-----------------|------------------------------|----------------------------------------------------------------|-------|
| hsa04080   | Neuroactive ligand-receptor interaction         | 0.0079602<br>51 | 0.39403243                   | NTS/NPY5R/GRM5/NPY2R/NMU/GALR1/<br>NPY1R/AGTR1/GNRH1/GABRE/GAL | 11    |
| hsa04218   | Cellular senescence                             | 0.0026961<br>8  | 0.177947873                  | SERPINE1/HLA-F/GADD45A/ITPR2/CCNA1/<br>IGFBP3/HLA-A/SLC25A5    | 8     |
| hsa04022   | cGMP-PKG signaling pathway                      | 0.0119028<br>66 | 0.44819415                   | NPPA/AGTR1/ITPR2/ATP2B3/CNGB1/<br>ATP1A2/SLC25A5               | 7     |
| hsa04024   | cAMP signaling pathway                          | 0.0389841<br>28 | 0.689750173                  | NPPA/ARAP3/NPY1R/ATP2B3/CNGB1/<br>ATP1A2/PDE10A                | 7     |
| hsa04060   | Cytokine-cytokine receptor interaction          | 0.0998589<br>1  | 0.689750173                  | LIF/CXCL10/BMP7/TNFRSF12A/TNFRSF18/<br>IL36G/EPOR              | 7     |
| hsa04020   | Calcium signaling pathway                       | 0.0646036<br>68 | 0.689750173                  | GRM5/AGTR1/ITPR2/NOS2/ATP2B3/SLC25A5                           | 6     |
| hsa04144   | Endocytosis                                     | 0.1763372<br>24 | 0.799081256                  | VPS37B/ARAP3/HSPA2/DNM1/HLA-F/HLA-A                            | 6     |
| hsa00062   | Fatty acid elongation                           | 5.19E-05        | 0.010268165                  | ELOVL2/ACOT1/ACOT2/ACAA2/HACD3                                 | 5     |
| hsa04925   | Aldosterone synthesis and secretion             | 0.0135816<br>41 | 0.44819415                   | NPPA/AGTR1/ITPR2/ATP2B3/ATP1A2                                 | 5     |
| hsa04261   | Adrenergic signaling in cardiomyocytes          | 0.0673820<br>76 | 0.689750173                  | CACNB3/AGTR1/SCN5A/ATP2B3/ATP1A2                               | 5     |
| hsa05224   | Breast cancer                                   | 0.0723901<br>99 | 0.689750173                  | APC/WNT6/GADD45A/PGR/FGF5                                      | 5     |
| hsa04934   | Cushing syndrome                                | 0.0830045<br>86 | 0.689750173                  | APC/AGTR1/RASD1/WNT6/ITPR2                                     | 5     |
| hsa04390   | Hippo signaling pathway                         | 0.0905176<br>73 | 0.689750173                  | FRMD6/APC/SERPINE1/BMP7/WNT6                                   | 5     |
| hsa05167   | Kaposi sarcoma-associated herpesvirus infection | 0.1284549<br>83 | 0.748061373                  | CLEC2B/HLA-F/ITPR2/MICA/HLA-A                                  | 5     |
| hsa05169   | Epstein-Barr virus infection                    | 0.1572053<br>45 | 0.799081256                  | CXCL10/HLA-F/GADD45A/CCNA1/HLA-A                               | 5     |
| hsa04010   | MAPK signaling pathway                          | 0.4572006<br>65 | 0.812762779                  | CACNB3/HSPA2/GADD45A/EFNA5/FGF5                                | 5     |
| hsa05165   | Human                                           | 0.5466930       | 0.846330358                  | APC/WNT6/HLA-F/CCNA1/HLA-A                                     | 5     |

|          |                                         |                 |             |                               |   |
|----------|-----------------------------------------|-----------------|-------------|-------------------------------|---|
|          | papillomavirus infection                | 4               |             |                               |   |
| hsa01040 | Biosynthesis of unsaturated fatty acids | 0.0007470<br>28 | 0.073955787 | ELOVL2/ACOT1/ACOT2/HACD3      | 4 |
| hsa04974 | Protein digestion and absorption        | 0.0403003<br>19 | 0.689750173 | COL21A1/COL5A1/ATP1A2/COL24A1 | 4 |
| hsa04972 | Pancreatic secretion                    | 0.0499298<br>65 | 0.689750173 | ITPR2/ATP2B3/ATP1A2/CEL       | 4 |
| hsa04915 | Estrogen signaling pathway              | 0.1072084<br>77 | 0.689750173 | HSPA2/FKBP5/ITPR2/PGR         | 4 |
| hsa04371 | Apelin signaling pathway                | 0.1536869<br>1  | 0.799081256 | AGTR1/SERPINE1/ITPR2/NOS2     | 4 |
| hsa04723 | Retrograde endocannabinoid signaling    | 0.1686215<br>49 | 0.799081256 | GRM5/ITPR2/GABRE/NAPEPLD      | 4 |
| hsa05226 | Gastric cancer                          | 0.1871928<br>03 | 0.799276255 | APC/WNT6/GADD45A/FGF5         | 4 |
| hsa04310 | Wnt signaling pathway                   | 0.2228257<br>88 | 0.812762779 | PRICKLE3/APC/WNT6/RSPO3       | 4 |
| hsa05202 | Transcriptional misregulation in cancer | 0.3126328<br>96 | 0.812762779 | PAX3/GADD45A/CCNA1/IGFBP3     | 4 |
| hsa05203 | Viral carcinogenesis                    | 0.3518236<br>23 | 0.812762779 | HLA-F/CCNA1/HLA-A/HIST1H2BH   | 4 |
| hsa05205 | Proteoglycans in cancer                 | 0.3696868<br>72 | 0.812762779 | COL21A1/HPSE2/WNT6/ITPR2      | 4 |
| hsa05166 | Human T-cell leukemia virus 1 infection | 0.4124035<br>55 | 0.812762779 | HLA-F/CCNA1/HLA-A/SLC25A5     | 4 |
| hsa05168 | Herpes simplex virus 1 infection        | 0.9397386       | 0.944508847 | ZNF560/ZNF208/HLA-F/HLA-A     | 4 |
| hsa00830 | Retinol metabolism                      | 0.0405660<br>5  | 0.689750173 | PNPLA4/HSD17B6/RDH10          | 3 |
| hsa01212 | Fatty acid metabolism                   | 0.0493461<br>5  | 0.689750173 | ELOVL2/ACAA2/HACD3            | 3 |
| hsa05416 | Viral myocarditis                       | 0.0493461<br>5  | 0.689750173 | HLA-F/HLA-A/SGCD              | 3 |
| hsa04612 | Antigen processing and presentation     | 0.0640972<br>53 | 0.689750173 | HSPA2/HLA-F/HLA-A             | 3 |
| hsa04924 | Renin secretion                         | 0.0749340<br>09 | 0.689750173 | NPPA/AGTR1/ITPR2              | 3 |
| hsa05217 | Basal cell carcinoma                    | 0.0749340<br>09 | 0.689750173 | APC/WNT6/GADD45A              | 3 |

|          |                                                          |                 |             |                         |   |
|----------|----------------------------------------------------------|-----------------|-------------|-------------------------|---|
| hsa04115 | p53 signaling pathway                                    | 0.0988277<br>83 | 0.689750173 | SERPINE1/GADD45A/IGFBP3 | 3 |
| hsa05412 | Arrhythmogenic right ventricular cardiomyopathy (ARVC)   | 0.1020088<br>32 | 0.689750173 | CACNB3/DSG2/SGCD        | 3 |
| hsa04970 | Salivary secretion                                       | 0.1185093<br>63 | 0.71105618  | ITPR2/ATP2B3/ATP1A2     | 3 |
| hsa05222 | Small cell lung cancer                                   | 0.1731417<br>8  | 0.799081256 | GADD45A/NOS2/BIRC7      | 3 |
| hsa00564 | Glycerophospholipid metabolism                           | 0.1848284<br>06 | 0.799276255 | GPD1/GPD1L/PLPP4        | 3 |
| hsa04066 | HIF-1 signaling pathway                                  | 0.1967192<br>07 | 0.799276255 | NPPA/SERPINE1/NOS2      | 3 |
| hsa05145 | Toxoplasmosis                                            | 0.2251437<br>58 | 0.812762779 | HSPA2/NOS2/BIRC7        | 3 |
| hsa04270 | Vascular smooth muscle contraction                       | 0.3053960<br>96 | 0.812762779 | NPPA/AGTR1/ITPR2        | 3 |
| hsa04514 | Cell adhesion molecules (CAMs)                           | 0.3526275<br>88 | 0.812762779 | SIGLEC1/HLA-F/HLA-A     | 3 |
| hsa04550 | Signaling pathways regulating pluripotency of stem cells | 0.3611975<br>46 | 0.812762779 | LIF/APC/WNT6            | 3 |
| hsa04072 | Phospholipase D signaling pathway                        | 0.3868008<br>5  | 0.812762779 | GRM5/AGTR1/DNM1         | 3 |
| hsa04921 | Oxytocin signaling pathway                               | 0.4037456<br>09 | 0.812762779 | NPPA/CACNB3/ITPR2       | 3 |
| hsa05225 | Hepatocellular carcinoma                                 | 0.4780608<br>36 | 0.823096049 | APC/WNT6/GADD45A        | 3 |
| hsa05016 | Huntington disease                                       | 0.5058366<br>64 | 0.831854934 | GRM5/DNAH3/SLC25A5      | 3 |
| hsa04360 | Axon guidance                                            | 0.5366416<br>95 | 0.846330358 | RHOD/BMP7/EFNA5         | 3 |
| hsa05170 | Human immunodeficiency virus 1 infection                 | 0.5913922<br>46 | 0.869717016 | HLA-F/ITPR2/HLA-A       | 3 |
| hsa04015 | Rap1 signaling pathway                                   | 0.6018399<br>13 | 0.869717016 | ARAP3/EFNA5/FGF5        | 3 |
| hsa04810 | Regulation of actin cytoskeleton                         | 0.6288460<br>48 | 0.881084419 | IQGAP2/APC/FGF5         | 3 |
| hsa05163 | Human cytomegalovirus infection                          | 0.6354007<br>09 | 0.881084419 | HLA-F/ITPR2/HLA-A       | 3 |

|          |                                                            |                 |             |                 |   |
|----------|------------------------------------------------------------|-----------------|-------------|-----------------|---|
| hsa04151 | PI3K-Akt signaling pathway                                 | 0.8949768<br>31 | 0.939502295 | EPOR/EFNA5/FGF5 | 3 |
| hsa00534 | Glycosaminoglycan biosynthesis - heparan sulfate / heparin | 0.0532920<br>3  | 0.689750173 | HS3ST3A1/EXTL1  | 2 |
| hsa05330 | Allograft rejection                                        | 0.0837423<br>3  | 0.689750173 | HLA-F/HLA-A     | 2 |
| hsa05332 | Graft-versus-host disease                                  | 0.0837423<br>3  | 0.689750173 | HLA-F/HLA-A     | 2 |
| hsa00640 | Propanoate metabolism                                      | 0.0884450<br>33 | 0.689750173 | LDHB/ALDH6A1    | 2 |
| hsa04940 | Type I diabetes mellitus                                   | 0.1030011<br>61 | 0.689750173 | HLA-F/HLA-A     | 2 |
| hsa04960 | Aldosterone-regulated sodium reabsorption                  | 0.1079911<br>89 | 0.689750173 | NR3C2/ATP1A2    | 2 |
| hsa04975 | Fat digestion and absorption                               | 0.1079911<br>89 | 0.689750173 | NPC1L1/CEL      | 2 |
| hsa05320 | Autoimmune thyroid disease                                 | 0.1181586<br>83 | 0.71105618  | HLA-F/HLA-A     | 2 |
| hsa04973 | Carbohydrate digestion and absorption                      | 0.1445293<br>34 | 0.799081256 | MGAM/ATP1A2     | 2 |
| hsa04961 | Endocrine and other factor-regulated calcium reabsorption  | 0.1608916<br>55 | 0.799081256 | DNM1/ATP1A2     | 2 |
| hsa00280 | Valine, leucine and isoleucine degradation                 | 0.1719814<br>67 | 0.799081256 | ACAA2/ALDH6A1   | 2 |
| hsa00330 | Arginine and proline metabolism                            | 0.1775736<br>13 | 0.799081256 | PRODH/NOS2      | 2 |
| hsa04978 | Mineral absorption                                         | 0.1775736<br>13 | 0.799081256 | ATP1A2/MT1G     | 2 |
| hsa04923 | Regulation of lipolysis in adipocytes                      | 0.1945117<br>87 | 0.799276255 | NPPA/NPY1R      | 2 |
| hsa00561 | Glycerolipid metabolism                                    | 0.2289281<br>3  | 0.812762779 | PLPP4/CEL       | 2 |
| hsa05213 | Endometrial cancer                                         | 0.2289281<br>3  | 0.812762779 | APC/GADD45A     | 2 |
| hsa04927 | Cortisol synthesis and secretion                           | 0.2405040<br>25 | 0.812762779 | AGTR1/ITPR2     | 2 |



|          |                                                  |                 |             |                |   |
|----------|--------------------------------------------------|-----------------|-------------|----------------|---|
| hsa04720 | Long-term potentiation                           | 0.2637290<br>14 | 0.812762779 | GRM5/ITPR2     | 2 |
| hsa04918 | Thyroid hormone synthesis                        | 0.2811634<br>42 | 0.812762779 | ITPR2/ATP1A2   | 2 |
| hsa05218 | Melanoma                                         | 0.2869703<br>22 | 0.812762779 | GADD45A/FGF5   | 2 |
| hsa01230 | Biosynthesis of amino acids                      | 0.3101403<br>38 | 0.812762779 | TKTL1/PAH      | 2 |
| hsa04971 | Gastric acid secretion                           | 0.3101403<br>38 | 0.812762779 | ITPR2/ATP1A2   | 2 |
| hsa04260 | Cardiac muscle contraction                       | 0.3159124<br>43 | 0.812762779 | CACNB3/ATP1A2  | 2 |
| hsa04742 | Taste transduction                               | 0.3159124<br>43 | 0.812762779 | ENTPD2/ASIC2   | 2 |
| hsa00562 | Inositol phosphate metabolism                    | 0.3216741<br>14 | 0.812762779 | ALDH6A1/ISYNA1 | 2 |
| hsa03320 | PPAR signaling pathway                           | 0.3216741<br>14 | 0.812762779 | FABP5/FABP6    | 2 |
| hsa05410 | Hypertrophic cardiomyopathy (HCM)                | 0.3784976<br>69 | 0.812762779 | CACNB3/SGCD    | 2 |
| hsa04540 | Gap junction                                     | 0.3840811<br>13 | 0.812762779 | GRM5/ITPR2     | 2 |
| hsa05210 | Colorectal cancer                                | 0.3896434<br>06 | 0.812762779 | APC/GADD45A    | 2 |
| hsa04912 | GnRH signaling pathway                           | 0.4007017<br>67 | 0.812762779 | ITPR2/GNRH1    | 2 |
| hsa05414 | Dilated cardiomyopathy (DCM)                     | 0.4007017<br>67 | 0.812762779 | CACNB3/SGCD    | 2 |
| hsa05032 | Morphine addiction                               | 0.4061965<br>15 | 0.812762779 | GABRE/PDE10A   | 2 |
| hsa04922 | Glucagon signaling pathway                       | 0.4333017<br>96 | 0.812762779 | ITPR2/LDHB     | 2 |
| hsa04070 | Phosphatidylinositol signaling system            | 0.4386453<br>1  | 0.812762779 | ITPR2/IP6K3    | 2 |
| hsa04750 | Inflammatory mediator regulation of TRP channels | 0.4386453<br>1  | 0.812762779 | ITPR2/ASIC2    | 2 |
| hsa04914 | Progesterone-mediated oocyte maturation          | 0.4439617<br>98 | 0.812762779 | PGR/CCNA1      | 2 |
| hsa04916 | Melanogenesis                                    | 0.4492508       | 0.812762779 | WNT6/TYRP1     | 2 |
| hsa04933 | AGE-RAGE                                         | 0.4597446       | 0.812762779 | AGTR1/SERPINE1 | 2 |

|          |                                                   |                 |             |               |   |
|----------|---------------------------------------------------|-----------------|-------------|---------------|---|
|          | signaling pathway<br>in diabetic<br>complications | 02              |             |               |   |
| hsa05142 | Chagas disease<br>(American<br>trypanosomiasis)   | 0.4701234<br>28 | 0.823096049 | SERPINE1/NOS2 | 2 |
| hsa04650 | Natural killer cell<br>mediated<br>cytotoxicity   | 0.4955486<br>17 | 0.831513781 | MICA/HLA-A    | 2 |
| hsa04668 | TNF signaling<br>pathway                          | 0.4955486<br>17 | 0.831513781 | LIF/CXCL10    | 2 |
| hsa01200 | Carbon metabolism                                 | 0.5201984<br>32 | 0.838358572 | TKTL1/ALDH6A1 | 2 |
| hsa04724 | Glutamatergic<br>synapse                          | 0.5250326<br>41 | 0.838358572 | GRM5/ITPR2    | 2 |
| hsa04152 | AMPK signaling<br>pathway                         | 0.5533520<br>85 | 0.846330358 | CAB39L/CCNA1  | 2 |
| hsa04114 | Oocyte meiosis                                    | 0.5579563<br>63 | 0.846330358 | ITPR2/PGR     | 2 |
| hsa00230 | Purine metabolism                                 | 0.5760391<br>98 | 0.857562115 | ENTPD2/PDE10A | 2 |
| hsa04110 | Cell cycle                                        | 0.5760391<br>98 | 0.857562115 | GADD45A/CCNA1 | 2 |
| hsa04210 | Apoptosis                                         | 0.6229875<br>87 | 0.881084419 | GADD45A/ITPR2 | 2 |
| hsa04145 | Phagosome                                         | 0.6468774<br>64 | 0.881084419 | HLA-F/HLA-A   | 2 |
| hsa04630 | JAK-STAT<br>signaling pathway                     | 0.6545734<br>16 | 0.881084419 | LIF/EPOR      | 2 |
| hsa04150 | mTOR signaling<br>pathway                         | 0.6768685<br>49 | 0.881514371 | WNT6/CAB39L   | 2 |
| hsa05164 | Influenza A                                       | 0.6910798<br>71 | 0.881514371 | HSPA2/CXCL10  | 2 |
| hsa04062 | Chemokine<br>signaling pathway                    | 0.7820204<br>36 | 0.916213292 | CXCL10/FGR    | 2 |
| hsa05206 | MicroRNAs in<br>cancer                            | 0.8371298<br>46 | 0.938052536 | TP63/APC      | 2 |
| hsa04014 | Ras signaling<br>pathway                          | 0.8597184<br>77 | 0.93944805  | EFNA5/FGF5    | 2 |

Note:

Pathway ID: KEGG pathway number

Description: Function description corresponding to the KEGG pathway number

*P* value: *P* value of significance test

FDR-adjusted *P*-Value: *P* value of multiple hypothesis test correction

Gene ID: Differentially expressed genes in this pathway

Count: Number of differentially expressed genes in this pathway

**Supplementary Table S4: The Primers of 11 fusion genes for Real time-PCR**

| <b>Sample ID</b>                 | <b>Fusion Gene</b> | <b>Forward Primer</b>   | <b>Reverse Primer</b> | <b>Fluorescence probe(5'FAM, 3'BHQ1)</b> |
|----------------------------------|--------------------|-------------------------|-----------------------|------------------------------------------|
| S01 (Grade II)                   | RNF213-SLC26A11    | TGAAGATGGAATCCGTAGCG    | CAGAAGCACAGCAGGAAGGT  | TCAGCTAAGGCTGGACCTGCTGCC                 |
| S01/ S02/ S03/<br>S04 (Grade II) | GATSL2-GTF2I       | AACTTGCCTTCCTGTCCTCC    | GTAGCTCATTGGCCTTTGGT  | TCCTCCAAGACCAGATGATGATTATT               |
| S03 (Grade II)                   | CPD-SEZ6           | ATCACAAACGGCGCACATTG    | TCCAGGATCGTGGCAGGAAG  | ATGATGTGGAAGTGACTTCCTGCCA                |
| S06 (Grade IV)                   | RC3H1-PKLR         | CCCAGCAAACCTTGAACCGACTA | TCCAACACGGAGGAAGCCAC  | ATGATGTGGAAGTGACTTCCTGCCA                |
| S06 (Grade IV)                   | MEX3B-KIAA1199     | TACCCAGTTCTGAGCATGTCG   | GCAGTGGCCCAAAGAGTTAT  | TGGGGCGGCAAGATCAAGGACGTTG                |
| S08 (Grade IV)                   | ABL2-NCF2          | TCGCTCAGGTACGAGGGACG    | TCCTTGGGTTTCATCTGGAAA | CAGATGGCAAGGGTGACCAAGGCTT                |
| S09 (Grade IV)                   | KIAA1549-BRAF      | CGTCCCAAACCTCAGCCTACA   | TCCATCACCACGAAATCCTT  | ATCGGATGCCCAGACTTGATTAGAG                |
| S09 (Grade IV)                   | CASK-SUGP1         | CATTGTAGAGTTATTGGAGAC   | GGGAGCAACCCCAAACCACC  | ACATGGTTTTTCGAATTGAAAGGCT                |
| S09 (Grade IV)                   | TMEM165-PDGFR      | GTCGAGAAAGGCAAAGGCATC   | TCGGGGACCGTCAAAGTGTA  | TCGAGAAAGGCAAAGGCATCACA                  |
| S09 (Grade IV)                   | SLC35F1-ECHDC1     | CTTGTGGGAAGACATCAGGG    | GCTTGGTATTATGCCCATCT  | AGGGAGCAGGTTAATGACTCCAGAG                |
| S09 (Grade IV)                   | TCF12-SCFD2        | CAATTCAGTGGATCAGGGAG    | GATTCATTAGAGCTTTGAGG  | ATTCAGTGGATCAGGGAGAGTCACA                |
